# Supplementary material
Source: publisher figshare collection journal article supplement (https://acs.figshare.com/ndownloader/files/4683190)
Supplement: Supplementary file 1 [file 4683190]

data_compound9

_audit_creation_method            SHELXL-97
_chemical_name_systematic
;
 ?
;
_chemical_name_common             ?
_chemical_melting_point           ?
_chemical_formula_moiety          ?
_chemical_formula_sum
 'C17 H29 N3 Si'
_chemical_formula_weight          303.52

loop_
 _atom_type_symbol
 _atom_type_description
 _atom_type_scat_dispersion_real
 _atom_type_scat_dispersion_imag
 _atom_type_scat_source
 'C'  'C'   0.0033   0.0016
 'International Tables Vol C Tables 4.2.6.8 and 6.1.1.4'
 'H'  'H'   0.0000   0.0000
 'International Tables Vol C Tables 4.2.6.8 and 6.1.1.4'
 'N'  'N'   0.0061   0.0033
 'International Tables Vol C Tables 4.2.6.8 and 6.1.1.4'
 'Si'  'Si'   0.0817   0.0704
 'International Tables Vol C Tables 4.2.6.8 and 6.1.1.4'

_symmetry_cell_setting            Monoclinic
_symmetry_space_group_name_H-M    'P c'

loop_
 _symmetry_equiv_pos_as_xyz
 'x, y, z'
 'x, -y, z+1/2'

_cell_length_a                    9.1474(8)
_cell_length_b                    18.2345(16)
_cell_length_c                    12.1173(10)
_cell_angle_alpha                 90.00
_cell_angle_beta                  111.935(4)
_cell_angle_gamma                 90.00
_cell_volume                      1874.8(3)
_cell_formula_units_Z             4
_cell_measurement_temperature     133(2)
_cell_measurement_reflns_used     6366
_cell_measurement_theta_min       2.65
_cell_measurement_theta_max       30.43

_exptl_crystal_description        tablet
_exptl_crystal_colour             colourless
_exptl_crystal_size_max           0.40
_exptl_crystal_size_mid           0.35
_exptl_crystal_size_min           0.25
_exptl_crystal_density_meas       'not measured'
_exptl_crystal_density_diffrn     1.075
_exptl_crystal_density_method     'not measured'
_exptl_crystal_F_000              664
_exptl_absorpt_coefficient_mu     0.124
_exptl_absorpt_correction_type    none
_exptl_absorpt_correction_T_min   ?
_exptl_absorpt_correction_T_max   ?
_exptl_absorpt_process_details    ?

_exptl_special_details
;
 ?
;

_diffrn_ambient_temperature       133(2)
_diffrn_radiation_wavelength      0.71073
_diffrn_radiation_type            MoK\a
_diffrn_radiation_source          'fine-focus sealed tube'
_diffrn_radiation_monochromator   graphite
_diffrn_measurement_device_type   'Bruker SMART 1000 CCD area detector'
_diffrn_measurement_method        'phi and omega scans'
_diffrn_detector_area_resol_mean  8.192
_diffrn_standards_number          ?
_diffrn_standards_interval_count  ?
_diffrn_standards_interval_time   ?
_diffrn_standards_decay_%         ?
_diffrn_reflns_number             35157
_diffrn_reflns_av_R_equivalents   0.0675
_diffrn_reflns_av_sigmaI/netI     0.1059
_diffrn_reflns_limit_h_min        -13
_diffrn_reflns_limit_h_max        13
_diffrn_reflns_limit_k_min        -26
_diffrn_reflns_limit_k_max        26
_diffrn_reflns_limit_l_min        -17
_diffrn_reflns_limit_l_max        17
_diffrn_reflns_theta_min          2.13
_diffrn_reflns_theta_max          30.51
_reflns_number_total              11222
_reflns_number_gt                 7145
_reflns_threshold_expression      >2sigma(I)

_computing_data_collection        'Bruker SMART'
_computing_cell_refinement        'Bruker SAINT'
_computing_data_reduction         'Bruker SAINT'
_computing_structure_solution     'SHELXS-97 (Sheldrick, 1990)'
_computing_structure_refinement   'SHELXL-97 (Sheldrick, 1997)'
_computing_molecular_graphics     'Siemens XP'
_computing_publication_material   SHELXL-97

_refine_special_details
;
 Refinement of F^2^ against ALL reflections.  The weighted R-factor wR and
 goodness of fit S are based on F^2^, conventional R-factors R are based
 on F, with F set to zero for negative F^2^. The threshold expression of
 F^2^ > 2sigma(F^2^) is used only for calculating R-factors(gt) etc. and is
 not relevant to the choice of reflections for refinement.  R-factors based
 on F^2^ are statistically about twice as large as those based on F, and R-
 factors based on ALL data will be even larger.
;

_refine_ls_structure_factor_coef  Fsqd
_refine_ls_matrix_type            full
_refine_ls_weighting_scheme       calc
_refine_ls_weighting_details
 'calc w=1/[\s^2^(Fo^2^)+(0.0302P)^2^] where P=(Fo^2^+2Fc^2^)/3'
_atom_sites_solution_primary      direct
_atom_sites_solution_secondary    difmap
_atom_sites_solution_hydrogens    geom
_refine_ls_hydrogen_treatment     'rigid methyls, others riding'
_refine_ls_extinction_method      none
_refine_ls_extinction_coef        ?
_refine_ls_abs_structure_details
 'Flack H D (1983), Acta Cryst. A39, 876-881'
_refine_ls_abs_structure_Flack    -0.02(6)
_refine_ls_number_reflns          11222
_refine_ls_number_parameters      395
_refine_ls_number_restraints      2
_refine_ls_R_factor_all           0.0935
_refine_ls_R_factor_gt            0.0493
_refine_ls_wR_factor_ref          0.0798
_refine_ls_wR_factor_gt           0.0720
_refine_ls_goodness_of_fit_ref    0.881
_refine_ls_restrained_S_all       0.881
_refine_ls_shift/su_max           0.001
_refine_ls_shift/su_mean          0.000

loop_
 _atom_site_label
 _atom_site_type_symbol
 _atom_site_fract_x
 _atom_site_fract_y
 _atom_site_fract_z
 _atom_site_U_iso_or_equiv
 _atom_site_adp_type
 _atom_site_occupancy
 _atom_site_symmetry_multiplicity
 _atom_site_calc_flag
 _atom_site_refinement_flags
 _atom_site_disorder_assembly
 _atom_site_disorder_group
Si1 Si 0.66151(6) 0.16248(3) 0.49384(5) 0.02505(12) Uani 1 1 d . . .
N1 N 0.74970(16) 0.11137(7) 0.64114(12) 0.0209(3) Uani 1 1 d . . .
N2 N 0.88452(16) 0.16365(7) 0.55324(12) 0.0210(3) Uani 1 1 d . . .
N3 N 0.61429(18) 0.24662(8) 0.53628(14) 0.0325(4) Uani 1 1 d . . .
C1 C 0.89428(19) 0.11502(9) 0.63881(14) 0.0199(4) Uani 1 1 d . . .
C2 C 1.0341(2) 0.06992(9) 0.70966(15) 0.0211(4) Uani 1 1 d . . .
C3 C 1.0662(2) 0.00508(10) 0.66347(17) 0.0289(4) Uani 1 1 d . . .
H3 H 0.9989 -0.0107 0.5865 0.035 Uiso 1 1 calc R . .
C4 C 1.1968(2) -0.03705(10) 0.72930(19) 0.0365(5) Uani 1 1 d . . .
H4 H 1.2187 -0.0813 0.6971 0.044 Uiso 1 1 calc R . .
C5 C 1.2942(2) -0.01447(12) 0.84105(19) 0.0376(5) Uani 1 1 d . . .
H5 H 1.3830 -0.0433 0.8862 0.045 Uiso 1 1 calc R . .
C6 C 1.2627(2) 0.04991(11) 0.88728(18) 0.0361(5) Uani 1 1 d . . .
H6 H 1.3302 0.0654 0.9644 0.043 Uiso 1 1 calc R . .
C7 C 1.1338(2) 0.09219(11) 0.82253(16) 0.0288(4) Uani 1 1 d . . .
H7 H 1.1132 0.1366 0.8552 0.035 Uiso 1 1 calc R . .
C8 C 0.4714(2) 0.28552(12) 0.4661(2) 0.0468(6) Uani 1 1 d . . .
H8A H 0.4089 0.2950 0.5150 0.070 Uiso 1 1 calc R . .
H8B H 0.4097 0.2556 0.3972 0.070 Uiso 1 1 calc R . .
H8C H 0.4990 0.3322 0.4387 0.070 Uiso 1 1 calc R . .
C9 C 0.7055(3) 0.28459(11) 0.6458(2) 0.0458(6) Uani 1 1 d . . .
H9A H 0.7365 0.3330 0.6268 0.069 Uiso 1 1 calc R . .
H9B H 0.8000 0.2560 0.6899 0.069 Uiso 1 1 calc R . .
H9C H 0.6415 0.2904 0.6944 0.069 Uiso 1 1 calc R . .
C10 C 0.6836(2) 0.06307(10) 0.70773(16) 0.0258(4) Uani 1 1 d . . .
C11 C 0.5176(2) 0.09363(11) 0.68327(18) 0.0364(5) Uani 1 1 d . . .
H11A H 0.5257 0.1448 0.7095 0.055 Uiso 1 1 calc R . .
H11B H 0.4668 0.0645 0.7269 0.055 Uiso 1 1 calc R . .
H11C H 0.4547 0.0910 0.5978 0.055 Uiso 1 1 calc R . .
C12 C 0.7788(2) 0.06647(12) 0.84168(17) 0.0385(5) Uani 1 1 d . . .
H12A H 0.8816 0.0431 0.8593 0.058 Uiso 1 1 calc R . .
H12B H 0.7216 0.0407 0.8841 0.058 Uiso 1 1 calc R . .
H12C H 0.7942 0.1178 0.8674 0.058 Uiso 1 1 calc R . .
C13 C 0.6718(2) -0.01608(10) 0.66495(19) 0.0376(5) Uani 1 1 d . . .
H13A H 0.6108 -0.0179 0.5791 0.056 Uiso 1 1 calc R . .
H13B H 0.6192 -0.0457 0.7066 0.056 Uiso 1 1 calc R . .
H13C H 0.7778 -0.0355 0.6816 0.056 Uiso 1 1 calc R . .
C14 C 1.0057(2) 0.19197(10) 0.51151(16) 0.0258(4) Uani 1 1 d . . .
C15 C 0.9305(2) 0.25724(11) 0.43165(18) 0.0405(5) Uani 1 1 d . . .
H15A H 0.8382 0.2406 0.3640 0.061 Uiso 1 1 calc R . .
H15B H 1.0071 0.2792 0.4025 0.061 Uiso 1 1 calc R . .
H15C H 0.8980 0.2938 0.4772 0.061 Uiso 1 1 calc R . .
C16 C 1.1498(2) 0.21860(12) 0.61709(18) 0.0385(5) Uani 1 1 d . . .
H16A H 1.1157 0.2521 0.6660 0.058 Uiso 1 1 calc R . .
H16B H 1.2221 0.2443 0.5875 0.058 Uiso 1 1 calc R . .
H16C H 1.2038 0.1764 0.6652 0.058 Uiso 1 1 calc R . .
C17 C 1.0548(3) 0.13471(11) 0.4409(2) 0.0449(6) Uani 1 1 d . . .
H17A H 1.1073 0.0939 0.4933 0.067 Uiso 1 1 calc R . .
H17B H 1.1275 0.1568 0.4081 0.067 Uiso 1 1 calc R . .
H17C H 0.9613 0.1165 0.3758 0.067 Uiso 1 1 calc R . .
Si1' Si 0.23472(6) 0.44541(3) 0.24435(4) 0.02627(12) Uani 1 1 d . . .
N1' N 0.39205(16) 0.43620(8) 0.17926(12) 0.0217(3) Uani 1 1 d . . .
N2' N 0.18171(16) 0.37244(8) 0.12279(13) 0.0241(3) Uani 1 1 d . . .
N3' N 0.13308(19) 0.52181(9) 0.17196(14) 0.0375(4) Uani 1 1 d . . .
C1' C 0.3259(2) 0.37580(9) 0.11914(14) 0.0220(4) Uani 1 1 d . . .
C2' C 0.4017(2) 0.31996(9) 0.06721(16) 0.0223(4) Uani 1 1 d . . .
C3' C 0.4865(2) 0.26302(10) 0.13760(19) 0.0332(5) Uani 1 1 d . . .
H3' H 0.4966 0.2597 0.2184 0.040 Uiso 1 1 calc R . .
C4' C 0.5568(3) 0.21063(11) 0.0903(2) 0.0497(6) Uani 1 1 d . . .
H4' H 0.6159 0.1718 0.1389 0.060 Uiso 1 1 calc R . .
C5' C 0.5408(3) 0.21524(13) -0.0267(2) 0.0542(7) Uani 1 1 d . . .
H5' H 0.5871 0.1788 -0.0593 0.065 Uiso 1 1 calc R . .
C6' C 0.4580(3) 0.27235(13) -0.0977(2) 0.0467(6) Uani 1 1 d . . .
H6' H 0.4491 0.2757 -0.1782 0.056 Uiso 1 1 calc R . .
C7' C 0.3880(2) 0.32474(11) -0.05058(17) 0.0319(5) Uani 1 1 d . . .
H7' H 0.3307 0.3640 -0.0990 0.038 Uiso 1 1 calc R . .
C8' C 0.0435(2) 0.56539(11) 0.2232(2) 0.0457(6) Uani 1 1 d . . .
H8'1 H 0.0728 0.6171 0.2232 0.069 Uiso 1 1 calc R . .
H8'2 H 0.0660 0.5493 0.3050 0.069 Uiso 1 1 calc R . .
H8'3 H -0.0692 0.5595 0.1761 0.069 Uiso 1 1 calc R . .
C9' C 0.1090(3) 0.54329(13) 0.05007(18) 0.0595(7) Uani 1 1 d . . .
H9'1 H -0.0018 0.5360 -0.0012 0.089 Uiso 1 1 calc R . .
H9'2 H 0.1759 0.5132 0.0211 0.089 Uiso 1 1 calc R . .
H9'3 H 0.1367 0.5951 0.0487 0.089 Uiso 1 1 calc R . .
C10' C 0.5489(2) 0.46910(10) 0.20362(15) 0.0255(4) Uani 1 1 d . . .
C11' C 0.5463(3) 0.54332(11) 0.26084(18) 0.0400(5) Uani 1 1 d . . .
H11D H 0.4615 0.5735 0.2061 0.060 Uiso 1 1 calc R . .
H11E H 0.6476 0.5681 0.2783 0.060 Uiso 1 1 calc R . .
H11F H 0.5283 0.5361 0.3349 0.060 Uiso 1 1 calc R . .
C12' C 0.5757(2) 0.48098(11) 0.08840(16) 0.0334(5) Uani 1 1 d . . .
H12D H 0.5889 0.4334 0.0555 0.050 Uiso 1 1 calc R . .
H12E H 0.6708 0.5106 0.1043 0.050 Uiso 1 1 calc R . .
H12F H 0.4848 0.5065 0.0311 0.050 Uiso 1 1 calc R . .
C13' C 0.6799(2) 0.42195(11) 0.28933(18) 0.0390(5) Uani 1 1 d . . .
H13D H 0.6625 0.4160 0.3639 0.058 Uiso 1 1 calc R . .
H13E H 0.7818 0.4458 0.3056 0.058 Uiso 1 1 calc R . .
H13F H 0.6795 0.3737 0.2536 0.058 Uiso 1 1 calc R . .
C14' C 0.0578(2) 0.31565(10) 0.08220(17) 0.0282(4) Uani 1 1 d . . .
C15' C -0.0842(2) 0.34839(13) 0.1011(2) 0.0587(7) Uani 1 1 d . . .
H15D H -0.0563 0.3592 0.1857 0.088 Uiso 1 1 calc R . .
H15E H -0.1716 0.3133 0.0749 0.088 Uiso 1 1 calc R . .
H15F H -0.1161 0.3937 0.0549 0.088 Uiso 1 1 calc R . .
C16' C 0.1074(3) 0.24594(12) 0.1554(2) 0.0575(7) Uani 1 1 d . . .
H16D H 0.1895 0.2211 0.1357 0.086 Uiso 1 1 calc R . .
H16E H 0.0162 0.2134 0.1375 0.086 Uiso 1 1 calc R . .
H16F H 0.1485 0.2583 0.2402 0.086 Uiso 1 1 calc R . .
C17' C 0.0124(3) 0.29850(13) -0.04910(19) 0.0555(7) Uani 1 1 d . . .
H17D H -0.0095 0.3443 -0.0947 0.083 Uiso 1 1 calc R . .
H17E H -0.0818 0.2674 -0.0763 0.083 Uiso 1 1 calc R . .
H17F H 0.0994 0.2727 -0.0610 0.083 Uiso 1 1 calc R . .

loop_
 _atom_site_aniso_label
 _atom_site_aniso_U_11
 _atom_site_aniso_U_22
 _atom_site_aniso_U_33
 _atom_site_aniso_U_23
 _atom_site_aniso_U_13
 _atom_site_aniso_U_12
Si1 0.0211(3) 0.0279(3) 0.0212(3) 0.0011(2) 0.0021(2) -0.0005(2)
N1 0.0194(8) 0.0215(8) 0.0212(8) 0.0033(6) 0.0068(7) 0.0000(7)
N2 0.0189(7) 0.0238(8) 0.0199(7) 0.0016(7) 0.0067(6) 0.0018(7)
N3 0.0263(9) 0.0258(9) 0.0412(10) 0.0044(8) 0.0076(8) 0.0068(7)
C1 0.0209(9) 0.0182(9) 0.0178(9) -0.0042(7) 0.0041(8) 0.0004(7)
C2 0.0200(9) 0.0208(9) 0.0228(9) 0.0035(8) 0.0084(8) -0.0002(8)
C3 0.0283(10) 0.0258(10) 0.0327(11) 0.0029(9) 0.0113(9) -0.0006(9)
C4 0.0388(13) 0.0225(10) 0.0562(15) 0.0102(10) 0.0270(12) 0.0077(9)
C5 0.0218(10) 0.0408(13) 0.0489(14) 0.0241(11) 0.0119(10) 0.0077(9)
C6 0.0250(10) 0.0459(13) 0.0310(11) 0.0104(10) 0.0031(9) -0.0011(10)
C7 0.0244(10) 0.0301(10) 0.0296(10) -0.0015(9) 0.0074(9) -0.0005(9)
C8 0.0361(12) 0.0548(15) 0.0568(14) 0.0253(12) 0.0256(11) 0.0188(11)
C9 0.0425(13) 0.0299(12) 0.0654(16) -0.0144(11) 0.0207(12) 0.0006(10)
C10 0.0235(10) 0.0272(10) 0.0284(10) 0.0020(8) 0.0117(8) -0.0027(8)
C11 0.0245(10) 0.0447(13) 0.0441(13) 0.0051(11) 0.0175(10) -0.0023(10)
C12 0.0334(12) 0.0554(14) 0.0290(11) 0.0052(10) 0.0143(10) -0.0041(10)
C13 0.0377(12) 0.0281(11) 0.0492(13) 0.0010(10) 0.0188(11) -0.0075(10)
C14 0.0267(10) 0.0249(10) 0.0286(10) 0.0037(8) 0.0132(9) 0.0003(8)
C15 0.0395(12) 0.0388(12) 0.0455(13) 0.0152(10) 0.0186(11) 0.0003(10)
C16 0.0278(11) 0.0438(13) 0.0419(12) 0.0084(10) 0.0106(10) -0.0083(10)
C17 0.0616(15) 0.0389(12) 0.0524(14) 0.0018(11) 0.0424(13) 0.0047(11)
Si1' 0.0279(3) 0.0287(3) 0.0230(3) -0.0011(2) 0.0104(2) 0.0056(2)
N1' 0.0212(8) 0.0229(8) 0.0215(8) -0.0027(7) 0.0085(6) 0.0009(6)
N2' 0.0208(8) 0.0242(8) 0.0287(8) -0.0038(7) 0.0108(7) 0.0003(7)
N3' 0.0386(10) 0.0373(10) 0.0312(9) -0.0011(8) 0.0067(8) 0.0194(8)
C1' 0.0242(10) 0.0218(9) 0.0184(9) 0.0047(8) 0.0062(8) 0.0044(8)
C2' 0.0187(9) 0.0208(9) 0.0275(10) -0.0052(8) 0.0088(8) -0.0034(8)
C3' 0.0334(11) 0.0259(10) 0.0436(12) -0.0009(9) 0.0182(10) -0.0016(9)
C4' 0.0408(13) 0.0265(11) 0.0840(19) -0.0083(12) 0.0260(13) 0.0058(10)
C5' 0.0432(14) 0.0451(14) 0.084(2) -0.0370(14) 0.0344(14) -0.0074(12)
C6' 0.0385(13) 0.0642(16) 0.0452(13) -0.0301(13) 0.0245(11) -0.0177(12)
C7' 0.0269(11) 0.0393(12) 0.0291(11) -0.0062(9) 0.0100(9) -0.0037(9)
C8' 0.0309(12) 0.0366(13) 0.0677(15) -0.0143(12) 0.0162(11) 0.0066(10)
C9' 0.0790(18) 0.0544(16) 0.0307(12) 0.0077(11) 0.0039(12) 0.0347(14)
C10' 0.0271(10) 0.0250(10) 0.0224(9) -0.0010(8) 0.0068(8) -0.0063(8)
C11' 0.0493(14) 0.0324(12) 0.0394(12) -0.0088(10) 0.0179(11) -0.0146(10)
C12' 0.0317(11) 0.0395(12) 0.0294(11) -0.0001(9) 0.0119(9) -0.0094(10)
C13' 0.0243(10) 0.0453(13) 0.0390(12) 0.0075(10) 0.0023(9) -0.0030(10)
C14' 0.0248(10) 0.0297(10) 0.0307(11) 0.0005(9) 0.0110(9) -0.0047(9)
C15' 0.0281(12) 0.0632(17) 0.089(2) -0.0194(15) 0.0263(14) -0.0097(12)
C16' 0.0435(14) 0.0506(15) 0.0713(18) 0.0240(13) 0.0133(13) -0.0125(12)
C17' 0.0546(15) 0.0728(18) 0.0380(13) -0.0113(13) 0.0162(12) -0.0389(14)

_geom_special_details
;
 All esds (except the esd in the dihedral angle between two l.s. planes)
 are estimated using the full covariance matrix.  The cell esds are taken
 into account individually in the estimation of esds in distances, angles
 and torsion angles; correlations between esds in cell parameters are only
 used when they are defined by crystal symmetry.  An approximate (isotropic)
 treatment of cell esds is used for estimating esds involving l.s. planes.
;

loop_
 _geom_bond_atom_site_label_1
 _geom_bond_atom_site_label_2
 _geom_bond_distance
 _geom_bond_site_symmetry_2
 _geom_bond_publ_flag
Si1 N3 1.7236(16) . ?
Si1 N2 1.8929(14) . ?
Si1 N1 1.9051(14) . ?
N1 C1 1.335(2) . ?
N1 C10 1.468(2) . ?
N2 C1 1.342(2) . ?
N2 C14 1.473(2) . ?
N3 C8 1.451(2) . ?
N3 C9 1.452(3) . ?
C1 C2 1.493(2) . ?
C2 C3 1.386(2) . ?
C2 C7 1.391(2) . ?
C3 C4 1.393(3) . ?
C4 C5 1.377(3) . ?
C5 C6 1.377(3) . ?
C6 C7 1.382(3) . ?
C10 C13 1.524(2) . ?
C10 C12 1.530(3) . ?
C10 C11 1.539(3) . ?
C14 C17 1.520(3) . ?
C14 C15 1.526(2) . ?
C14 C16 1.533(2) . ?
Si1' N3' 1.7220(16) . ?
Si1' N1' 1.8892(14) . ?
Si1' N2' 1.9083(15) . ?
N1' C1' 1.334(2) . ?
N1' C10' 1.480(2) . ?
N2' C1' 1.338(2) . ?
N2' C14' 1.478(2) . ?
N3' C8' 1.438(2) . ?
N3' C9' 1.463(3) . ?
C1' C2' 1.496(2) . ?
C2' C3' 1.383(3) . ?
C2' C7' 1.388(2) . ?
C3' C4' 1.389(3) . ?
C4' C5' 1.373(3) . ?
C5' C6' 1.382(3) . ?
C6' C7' 1.386(3) . ?
C10' C12' 1.520(2) . ?
C10' C13' 1.524(3) . ?
C10' C11' 1.525(3) . ?
C14' C16' 1.519(3) . ?
C14' C17' 1.519(3) . ?
C14' C15' 1.522(3) . ?

loop_
 _geom_angle_atom_site_label_1
 _geom_angle_atom_site_label_2
 _geom_angle_atom_site_label_3
 _geom_angle
 _geom_angle_site_symmetry_1
 _geom_angle_site_symmetry_3
 _geom_angle_publ_flag
N3 Si1 N2 103.36(7) . . ?
N3 Si1 N1 102.79(7) . . ?
N2 Si1 N1 68.30(6) . . ?
C1 N1 C10 130.98(14) . . ?
C1 N1 Si1 91.83(10) . . ?
C10 N1 Si1 133.72(11) . . ?
C1 N2 C14 130.96(14) . . ?
C1 N2 Si1 92.15(10) . . ?
C14 N2 Si1 135.71(11) . . ?
C8 N3 C9 112.75(16) . . ?
C8 N3 Si1 122.12(14) . . ?
C9 N3 Si1 125.07(13) . . ?
N1 C1 N2 105.59(14) . . ?
N1 C1 C2 127.09(15) . . ?
N2 C1 C2 127.15(15) . . ?
C3 C2 C7 119.08(17) . . ?
C3 C2 C1 120.20(16) . . ?
C7 C2 C1 120.72(16) . . ?
C2 C3 C4 120.33(18) . . ?
C5 C4 C3 119.98(19) . . ?
C4 C5 C6 119.88(18) . . ?
C5 C6 C7 120.57(19) . . ?
C6 C7 C2 120.16(19) . . ?
N1 C10 C13 111.89(15) . . ?
N1 C10 C12 111.76(14) . . ?
C13 C10 C12 109.83(16) . . ?
N1 C10 C11 104.84(14) . . ?
C13 C10 C11 109.75(15) . . ?
C12 C10 C11 108.62(16) . . ?
N2 C14 C17 111.77(15) . . ?
N2 C14 C15 105.80(14) . . ?
C17 C14 C15 109.67(16) . . ?
N2 C14 C16 110.33(14) . . ?
C17 C14 C16 110.15(17) . . ?
C15 C14 C16 108.99(16) . . ?
N3' Si1' N1' 102.11(7) . . ?
N3' Si1' N2' 103.76(7) . . ?
N1' Si1' N2' 68.24(6) . . ?
C1' N1' C10' 130.65(14) . . ?
C1' N1' Si1' 92.34(11) . . ?
C10' N1' Si1' 135.55(11) . . ?
C1' N2' C14' 131.67(15) . . ?
C1' N2' Si1' 91.39(11) . . ?
C14' N2' Si1' 133.45(11) . . ?
C8' N3' C9' 113.10(17) . . ?
C8' N3' Si1' 120.91(15) . . ?
C9' N3' Si1' 125.44(14) . . ?
N1' C1' N2' 105.74(15) . . ?
N1' C1' C2' 127.21(15) . . ?
N2' C1' C2' 126.87(16) . . ?
C3' C2' C7' 119.70(17) . . ?
C3' C2' C1' 119.52(16) . . ?
C7' C2' C1' 120.79(16) . . ?
C2' C3' C4' 120.1(2) . . ?
C5' C4' C3' 119.8(2) . . ?
C4' C5' C6' 120.7(2) . . ?
C5' C6' C7' 119.5(2) . . ?
C6' C7' C2' 120.2(2) . . ?
N1' C10' C12' 110.58(14) . . ?
N1' C10' C13' 111.35(15) . . ?
C12' C10' C13' 110.53(16) . . ?
N1' C10' C11' 105.77(15) . . ?
C12' C10' C11' 109.04(15) . . ?
C13' C10' C11' 109.42(16) . . ?
N2' C14' C16' 111.54(15) . . ?
N2' C14' C17' 111.60(15) . . ?
C16' C14' C17' 110.14(18) . . ?
N2' C14' C15' 105.47(15) . . ?
C16' C14' C15' 109.02(18) . . ?
C17' C14' C15' 108.90(19) . . ?

loop_
 _geom_torsion_atom_site_label_1
 _geom_torsion_atom_site_label_2
 _geom_torsion_atom_site_label_3
 _geom_torsion_atom_site_label_4
 _geom_torsion
 _geom_torsion_site_symmetry_1
 _geom_torsion_site_symmetry_2
 _geom_torsion_site_symmetry_3
 _geom_torsion_site_symmetry_4
 _geom_torsion_publ_flag
N3 Si1 N1 C1 -108.89(11) . . . . ?
N2 Si1 N1 C1 -9.41(9) . . . . ?
N3 Si1 N1 C10 91.35(16) . . . . ?
N2 Si1 N1 C10 -169.18(17) . . . . ?
N3 Si1 N2 C1 108.02(11) . . . . ?
N1 Si1 N2 C1 9.37(9) . . . . ?
N3 Si1 N2 C14 -84.05(16) . . . . ?
N1 Si1 N2 C14 177.30(17) . . . . ?
N2 Si1 N3 C8 148.38(15) . . . . ?
N1 Si1 N3 C8 -141.24(15) . . . . ?
N2 Si1 N3 C9 -34.62(17) . . . . ?
N1 Si1 N3 C9 35.76(17) . . . . ?
C10 N1 C1 N2 173.52(15) . . . . ?
Si1 N1 C1 N2 12.86(13) . . . . ?
C10 N1 C1 C2 -2.0(3) . . . . ?
Si1 N1 C1 C2 -162.63(15) . . . . ?
C14 N2 C1 N1 178.20(15) . . . . ?
Si1 N2 C1 N1 -12.95(13) . . . . ?
C14 N2 C1 C2 -6.3(3) . . . . ?
Si1 N2 C1 C2 162.54(15) . . . . ?
N1 C1 C2 C3 92.0(2) . . . . ?
N2 C1 C2 C3 -82.6(2) . . . . ?
N1 C1 C2 C7 -88.0(2) . . . . ?
N2 C1 C2 C7 97.4(2) . . . . ?
C7 C2 C3 C4 -0.1(3) . . . . ?
C1 C2 C3 C4 179.86(16) . . . . ?
C2 C3 C4 C5 0.3(3) . . . . ?
C3 C4 C5 C6 -0.3(3) . . . . ?
C4 C5 C6 C7 0.1(3) . . . . ?
C5 C6 C7 C2 0.1(3) . . . . ?
C3 C2 C7 C6 -0.1(3) . . . . ?
C1 C2 C7 C6 179.92(16) . . . . ?
C1 N1 C10 C13 -68.3(2) . . . . ?
Si1 N1 C10 C13 84.48(19) . . . . ?
C1 N1 C10 C12 55.4(2) . . . . ?
Si1 N1 C10 C12 -151.88(13) . . . . ?
C1 N1 C10 C11 172.85(17) . . . . ?
Si1 N1 C10 C11 -34.4(2) . . . . ?
C1 N2 C14 C17 72.5(2) . . . . ?
Si1 N2 C14 C17 -91.4(2) . . . . ?
C1 N2 C14 C15 -168.13(17) . . . . ?
Si1 N2 C14 C15 27.9(2) . . . . ?
C1 N2 C14 C16 -50.4(2) . . . . ?
Si1 N2 C14 C16 145.68(14) . . . . ?
N3' Si1' N1' C1' -109.91(11) . . . . ?
N2' Si1' N1' C1' -9.76(10) . . . . ?
N3' Si1' N1' C10' 83.51(17) . . . . ?
N2' Si1' N1' C10' -176.33(18) . . . . ?
N3' Si1' N2' C1' 107.48(11) . . . . ?
N1' Si1' N2' C1' 9.73(10) . . . . ?
N3' Si1' N2' C14' -92.65(16) . . . . ?
N1' Si1' N2' C14' 169.60(17) . . . . ?
N1' Si1' N3' C8' -156.12(15) . . . . ?
N2' Si1' N3' C8' 133.62(15) . . . . ?
N1' Si1' N3' C9' 33.0(2) . . . . ?
N2' Si1' N3' C9' -37.3(2) . . . . ?
C10' N1' C1' N2' -178.88(16) . . . . ?
Si1' N1' C1' N2' 13.50(13) . . . . ?
C10' N1' C1' C2' 5.8(3) . . . . ?
Si1' N1' C1' C2' -161.83(16) . . . . ?
C14' N2' C1' N1' -173.81(16) . . . . ?
Si1' N2' C1' N1' -13.35(13) . . . . ?
C14' N2' C1' C2' 1.5(3) . . . . ?
Si1' N2' C1' C2' 161.99(16) . . . . ?
N1' C1' C2' C3' 85.8(2) . . . . ?
N2' C1' C2' C3' -88.5(2) . . . . ?
N1' C1' C2' C7' -94.0(2) . . . . ?
N2' C1' C2' C7' 91.6(2) . . . . ?
C7' C2' C3' C4' -0.4(3) . . . . ?
C1' C2' C3' C4' 179.74(17) . . . . ?
C2' C3' C4' C5' -0.6(3) . . . . ?
C3' C4' C5' C6' 1.4(3) . . . . ?
C4' C5' C6' C7' -1.2(3) . . . . ?
C5' C6' C7' C2' 0.2(3) . . . . ?
C3' C2' C7' C6' 0.5(3) . . . . ?
C1' C2' C7' C6' -179.58(17) . . . . ?
C1' N1' C10' C12' 54.0(2) . . . . ?
Si1' N1' C10' C12' -143.78(14) . . . . ?
C1' N1' C10' C13' -69.3(2) . . . . ?
Si1' N1' C10' C13' 92.92(19) . . . . ?
C1' N1' C10' C11' 171.95(16) . . . . ?
Si1' N1' C10' C11' -25.9(2) . . . . ?
C1' N2' C14' C16' 67.2(2) . . . . ?
Si1' N2' C14' C16' -85.4(2) . . . . ?
C1' N2' C14' C17' -56.5(3) . . . . ?
Si1' N2' C14' C17' 150.91(15) . . . . ?
C1' N2' C14' C15' -174.62(19) . . . . ?
Si1' N2' C14' C15' 32.8(2) . . . . ?

_diffrn_measured_fraction_theta_max    0.999
_diffrn_reflns_theta_full              30.00
_diffrn_measured_fraction_theta_full   1.000
_refine_diff_density_max    0.575
_refine_diff_density_min   -0.280
_refine_diff_density_rms    0.043


#===END


data_compound12 
 
_audit_creation_method            SHELXL-97 
_chemical_name_systematic 
; 
 ? 
; 
_chemical_name_common             ? 
_chemical_melting_point           ? 
_chemical_formula_moiety          ? 
_chemical_formula_sum 
 'C21 H37 N2 P Si' 
_chemical_formula_weight          376.59 
 
loop_ 
 _atom_type_symbol 
 _atom_type_description 
 _atom_type_scat_dispersion_real 
 _atom_type_scat_dispersion_imag 
 _atom_type_scat_source 
 'C'  'C'   0.0033   0.0016 
 'International Tables Vol C Tables 4.2.6.8 and 6.1.1.4' 
 'H'  'H'   0.0000   0.0000 
 'International Tables Vol C Tables 4.2.6.8 and 6.1.1.4' 
 'N'  'N'   0.0061   0.0033 
 'International Tables Vol C Tables 4.2.6.8 and 6.1.1.4' 
 'Si'  'Si'   0.0817   0.0704 
 'International Tables Vol C Tables 4.2.6.8 and 6.1.1.4' 
 'P'  'P'   0.1023   0.0942 
 'International Tables Vol C Tables 4.2.6.8 and 6.1.1.4' 
 
_symmetry_cell_setting            monoclinic 
_symmetry_space_group_name_H-M    P2(1)
 
loop_ 
 _symmetry_equiv_pos_as_xyz 
 'x, y, z' 
 '-x, y+1/2, -z' 
 
_cell_length_a                    9.0623(18) 
_cell_length_b                    10.209(2) 
_cell_length_c                    12.720(3) 
_cell_angle_alpha                 90.00 
_cell_angle_beta                  94.17(3) 
_cell_angle_gamma                 90.00 
_cell_volume                      1173.8(4) 
_cell_formula_units_Z             2 
_cell_measurement_temperature     170(2) 
_cell_measurement_reflns_used     1671
_cell_measurement_theta_min       2.25 
_cell_measurement_theta_max       29.16
 
_exptl_crystal_description        prism 
_exptl_crystal_colour             yellow
_exptl_crystal_size_max           0.50 
_exptl_crystal_size_mid           0.50 
_exptl_crystal_size_min           0.20 
_exptl_crystal_density_meas       ? 
_exptl_crystal_density_diffrn     1.066 
_exptl_crystal_density_method     'not measured' 
_exptl_crystal_F_000              412 
_exptl_absorpt_coefficient_mu     0.174 
_exptl_absorpt_correction_type    none 
_exptl_absorpt_correction_T_min   0.9178 
_exptl_absorpt_correction_T_max   0.9659 
_exptl_absorpt_process_details    ? 
 
_exptl_special_details 
; 
 ? 
; 
 
_diffrn_ambient_temperature       170(2) 
_diffrn_radiation_wavelength      0.71073 
_diffrn_radiation_type            MoK\a 
_diffrn_radiation_source          'fine-focus sealed tube' 
_diffrn_radiation_monochromator   graphite 
_diffrn_measurement_device_type   'Stoe IPDS 2T' 
_diffrn_measurement_method        'omega-scans'
_diffrn_detector_area_resol_mean  ? 
_diffrn_standards_number          ? 
_diffrn_standards_interval_count  ? 
_diffrn_standards_interval_time   ? 
_diffrn_standards_decay_%         ? 
_diffrn_reflns_number             6303 
_diffrn_reflns_av_R_equivalents   0.0378 
_diffrn_reflns_av_sigmaI/netI     0.0253 
_diffrn_reflns_limit_h_min        -12 
_diffrn_reflns_limit_h_max        12 
_diffrn_reflns_limit_k_min        -13 
_diffrn_reflns_limit_k_max        13 
_diffrn_reflns_limit_l_min        0 
_diffrn_reflns_limit_l_max        17 
_diffrn_reflns_theta_min          2.25 
_diffrn_reflns_theta_max          29.16 
_reflns_number_total              6303 
_reflns_number_gt                 5742 
_reflns_threshold_expression      >2sigma(I) 
 
_computing_data_collection        'Stoe XAREA' 
_computing_cell_refinement        'Stoe XAREA' 
_computing_data_reduction         'Stoe XAREA' 
_computing_structure_solution     'SHELXS-97 (Sheldrick, 1990)' 
_computing_structure_refinement   'SHELXL-97 (Sheldrick, 1997)' 
_computing_molecular_graphics     'Bruker SHELXTL PLUS'  
_computing_publication_material   'Bruker SHELXTL PLUS'
 
_refine_special_details 
; 
 Refinement of F^2^ against ALL reflections.  The weighted R-factor wR and 
 goodness of fit S are based on F^2^, conventional R-factors R are based 
 on F, with F set to zero for negative F^2^. The threshold expression of 
 F^2^ > 2sigma(F^2^) is used only for calculating R-factors(gt) etc. and is 
 not relevant to the choice of reflections for refinement.  R-factors based 
 on F^2^ are statistically about twice as large as those based on F, and R- 
 factors based on ALL data will be even larger. 
; 
 
_refine_ls_structure_factor_coef  Fsqd  
_refine_ls_matrix_type            full 
_refine_ls_weighting_scheme       calc  
_refine_ls_weighting_details 
 'calc w=1/[\s^2^(Fo^2^)+(0.0478P)^2^+0.0000P] where P=(Fo^2^+2Fc^2^)/3' 
_atom_sites_solution_primary      direct 
_atom_sites_solution_secondary    difmap 
_atom_sites_solution_hydrogens    geom 
_refine_ls_hydrogen_treatment     refall 
_refine_ls_extinction_method      none 
_refine_ls_extinction_coef        ? 
_refine_ls_abs_structure_details 
 'Flack H D (1983), Acta Cryst. A39, 876-881' 
_refine_ls_abs_structure_Flack    -0.03(5) 
_refine_ls_number_reflns          6303 
_refine_ls_number_parameters      374 
_refine_ls_number_restraints      1 
_refine_ls_R_factor_all           0.0322 
_refine_ls_R_factor_gt            0.0283 
_refine_ls_wR_factor_ref          0.0683 
_refine_ls_wR_factor_gt           0.0671 
_refine_ls_goodness_of_fit_ref    0.962 
_refine_ls_restrained_S_all       0.962 
_refine_ls_shift/su_max           0.189 
_refine_ls_shift/su_mean          0.013 
 
loop_ 
 _atom_site_label 
 _atom_site_type_symbol 
 _atom_site_fract_x 
 _atom_site_fract_y 
 _atom_site_fract_z 
 _atom_site_U_iso_or_equiv 
 _atom_site_adp_type 
 _atom_site_occupancy 
 _atom_site_symmetry_multiplicity 
 _atom_site_calc_flag 
 _atom_site_refinement_flags 
 _atom_site_disorder_assembly 
 _atom_site_disorder_group 
P1 P 0.39898(3) 0.31143(3) 0.17261(2) 0.02348(7) Uani 1 1 d . . . 
Si1 Si 0.24093(4) 0.33459(3) 0.30562(2) 0.02310(8) Uani 1 1 d . . . 
N1 N 0.07410(11) 0.42742(10) 0.24952(9) 0.0242(2) Uani 1 1 d . . . 
N2 N 0.26274(12) 0.51442(10) 0.33235(8) 0.0235(2) Uani 1 1 d . . . 
C1 C -0.08152(15) 0.38728(14) 0.22236(12) 0.0305(3) Uani 1 1 d . . . 
C2 C -0.0748(2) 0.2551(2) 0.1693(2) 0.0617(7) Uani 1 1 d . . . 
C3 C -0.1621(2) 0.3695(3) 0.32204(18) 0.0570(5) Uani 1 1 d . . . 
C4 C -0.1633(3) 0.4860(3) 0.1498(3) 0.0757(9) Uani 1 1 d . . . 
C5 C 0.12419(13) 0.53937(12) 0.29492(9) 0.0225(2) Uani 1 1 d . . . 
C6 C 0.04114(13) 0.66427(12) 0.30520(10) 0.0259(2) Uani 1 1 d . . . 
C7 C -0.03350(16) 0.69075(15) 0.39410(12) 0.0348(3) Uani 1 1 d . . . 
C8 C -0.11012(17) 0.80840(19) 0.40168(14) 0.0457(4) Uani 1 1 d . . . 
C9 C -0.11172(19) 0.89863(16) 0.32074(18) 0.0488(4) Uani 1 1 d . . . 
C10 C -0.03718(18) 0.87282(16) 0.23220(16) 0.0430(4) Uani 1 1 d . . . 
C11 C 0.03868(17) 0.75564(14) 0.22385(13) 0.0327(3) Uani 1 1 d . . . 
C12 C 0.38118(15) 0.60119(13) 0.37736(11) 0.0284(3) Uani 1 1 d . . . 
C13 C 0.3266(2) 0.69665(19) 0.45832(17) 0.0469(4) Uani 1 1 d . . . 
C14 C 0.49620(18) 0.51087(17) 0.43352(14) 0.0396(3) Uani 1 1 d . . . 
C15 C 0.4503(2) 0.6725(2) 0.28800(16) 0.0489(4) Uani 1 1 d . . . 
C16 C 0.30104(15) 0.35257(14) 0.04205(10) 0.0301(3) Uani 1 1 d . . . 
C17 C 0.2792(2) 0.50083(17) 0.03596(13) 0.0415(4) Uani 1 1 d . . . 
C18 C 0.3901(2) 0.3058(2) -0.04812(12) 0.0437(3) Uani 1 1 d . . . 
C19 C 0.41786(16) 0.12863(13) 0.16626(11) 0.0284(3) Uani 1 1 d . . . 
C20 C 0.5060(2) 0.08046(17) 0.26566(15) 0.0414(4) Uani 1 1 d . . . 
C21 C 0.27410(19) 0.05237(15) 0.14771(15) 0.0383(3) Uani 1 1 d . . . 
H2A H -0.168(3) 0.223(3) 0.159(2) 0.068(7) Uiso 1 1 d . . . 
H2B H -0.030(3) 0.268(3) 0.101(2) 0.088(9) Uiso 1 1 d . . . 
H2C H -0.017(3) 0.200(3) 0.222(2) 0.081(8) Uiso 1 1 d . . . 
H3A H -0.177(3) 0.449(3) 0.353(2) 0.085(9) Uiso 1 1 d . . . 
H3B H -0.252(3) 0.335(3) 0.3052(17) 0.061(6) Uiso 1 1 d . . . 
H3C H -0.092(4) 0.295(4) 0.376(3) 0.111(11) Uiso 1 1 d . . . 
H4A H -0.103(3) 0.507(3) 0.091(2) 0.080(8) Uiso 1 1 d . . . 
H4B H -0.249(3) 0.447(3) 0.1245(19) 0.064(7) Uiso 1 1 d . . . 
H4C H -0.167(3) 0.575(3) 0.172(2) 0.085(9) Uiso 1 1 d . . . 
H7 H -0.034(2) 0.632(2) 0.4509(18) 0.054(6) Uiso 1 1 d . . . 
H8 H -0.156(2) 0.827(2) 0.4669(16) 0.052(5) Uiso 1 1 d . . . 
H9 H -0.165(3) 0.983(2) 0.3233(18) 0.060(6) Uiso 1 1 d . . . 
H10 H -0.038(2) 0.932(2) 0.1758(17) 0.047(5) Uiso 1 1 d . . . 
H11 H 0.085(2) 0.7403(18) 0.1649(16) 0.036(5) Uiso 1 1 d . . . 
H13A H 0.270(2) 0.766(2) 0.4256(17) 0.051(6) Uiso 1 1 d . . . 
H13B H 0.415(3) 0.739(2) 0.4943(19) 0.064(7) Uiso 1 1 d . . . 
H13C H 0.273(3) 0.657(3) 0.510(2) 0.070(8) Uiso 1 1 d . . . 
H14A H 0.451(2) 0.463(2) 0.4946(19) 0.057(6) Uiso 1 1 d . . . 
H14B H 0.533(2) 0.448(2) 0.3846(16) 0.041(5) Uiso 1 1 d . . . 
H14C H 0.573(3) 0.561(2) 0.4618(17) 0.052(6) Uiso 1 1 d . . . 
H15A H 0.481(3) 0.605(3) 0.235(2) 0.088(9) Uiso 1 1 d . . . 
H15B H 0.531(3) 0.730(2) 0.3169(17) 0.052(6) Uiso 1 1 d . . . 
H15C H 0.386(3) 0.737(2) 0.2651(18) 0.057(6) Uiso 1 1 d . . . 
H16 H 0.1993(19) 0.311(2) 0.0368(12) 0.033(4) Uiso 1 1 d . . . 
H17A H 0.223(3) 0.529(2) 0.089(2) 0.055(6) Uiso 1 1 d . . . 
H17B H 0.234(2) 0.522(2) -0.0366(17) 0.052(6) Uiso 1 1 d . . . 
H17C H 0.363(3) 0.546(2) 0.0419(17) 0.055(6) Uiso 1 1 d . . . 
H18A H 0.483(2) 0.340(2) -0.0393(16) 0.054(6) Uiso 1 1 d . . . 
H18B H 0.344(2) 0.334(3) -0.1165(17) 0.057(6) Uiso 1 1 d . . . 
H18C H 0.394(3) 0.206(3) -0.0498(19) 0.062(6) Uiso 1 1 d . . . 
H19 H 0.4735(19) 0.1107(17) 0.1072(13) 0.029(4) Uiso 1 1 d . . . 
H20A H 0.453(3) 0.090(2) 0.3276(19) 0.054(6) Uiso 1 1 d . . . 
H20B H 0.598(3) 0.129(2) 0.2786(18) 0.055(6) Uiso 1 1 d . . . 
H20C H 0.531(3) -0.008(2) 0.2617(18) 0.059(6) Uiso 1 1 d . . . 
H21A H 0.218(3) 0.058(2) 0.199(2) 0.063(7) Uiso 1 1 d . . . 
H21B H 0.214(2) 0.086(2) 0.0891(17) 0.042(5) Uiso 1 1 d . . . 
H21C H 0.299(2) -0.040(2) 0.1427(15) 0.040(5) Uiso 1 1 d . . . 
 
loop_ 
 _atom_site_aniso_label 
 _atom_site_aniso_U_11 
 _atom_site_aniso_U_22 
 _atom_site_aniso_U_33 
 _atom_site_aniso_U_23 
 _atom_site_aniso_U_13 
 _atom_site_aniso_U_12 
P1 0.02242(14) 0.02327(15) 0.02511(14) -0.00127(11) 0.00409(10) -0.00015(11) 
Si1 0.02558(16) 0.01969(15) 0.02452(15) 0.00015(12) 0.00507(11) 0.00072(12) 
N1 0.0190(5) 0.0236(5) 0.0300(5) -0.0018(4) 0.0027(4) -0.0022(4) 
N2 0.0227(5) 0.0210(5) 0.0263(5) -0.0039(4) -0.0009(4) 0.0021(4) 
C1 0.0201(6) 0.0316(6) 0.0394(7) -0.0015(5) 0.0006(5) -0.0057(5) 
C2 0.0317(9) 0.0575(12) 0.0968(18) -0.0407(12) 0.0112(10) -0.0182(8) 
C3 0.0338(8) 0.0771(14) 0.0626(11) -0.0171(10) 0.0194(8) -0.0245(9) 
C4 0.0489(12) 0.0661(14) 0.105(2) 0.0366(14) -0.0459(13) -0.0246(11) 
C5 0.0229(6) 0.0219(5) 0.0230(5) 0.0003(4) 0.0034(4) 0.0006(4) 
C6 0.0207(5) 0.0232(6) 0.0334(6) -0.0024(5) -0.0004(5) 0.0022(4) 
C7 0.0309(7) 0.0357(8) 0.0381(7) -0.0044(6) 0.0048(6) 0.0044(5) 
C8 0.0356(7) 0.0464(9) 0.0559(9) -0.0175(8) 0.0078(6) 0.0101(7) 
C9 0.0340(8) 0.0326(8) 0.0792(13) -0.0090(8) 0.0009(8) 0.0123(6) 
C10 0.0350(8) 0.0293(7) 0.0635(10) 0.0089(7) -0.0044(7) 0.0036(6) 
C11 0.0292(7) 0.0281(6) 0.0408(8) 0.0044(5) 0.0030(6) 0.0008(5) 
C12 0.0245(6) 0.0262(6) 0.0338(7) -0.0067(5) -0.0036(5) -0.0016(5) 
C13 0.0363(8) 0.0441(9) 0.0588(11) -0.0279(8) -0.0075(8) 0.0034(7) 
C14 0.0322(7) 0.0410(8) 0.0436(8) -0.0109(7) -0.0112(6) 0.0066(6) 
C15 0.0408(9) 0.0496(10) 0.0550(10) 0.0101(8) -0.0053(8) -0.0182(8) 
C16 0.0316(6) 0.0326(7) 0.0264(6) 0.0020(5) 0.0050(5) -0.0003(5) 
C17 0.0536(10) 0.0371(8) 0.0347(8) 0.0105(6) 0.0088(7) 0.0058(7) 
C18 0.0511(9) 0.0540(10) 0.0267(6) -0.0020(7) 0.0078(6) 0.0073(8) 
C19 0.0306(7) 0.0244(6) 0.0307(7) -0.0024(5) 0.0067(5) 0.0036(5) 
C20 0.0417(9) 0.0330(8) 0.0481(9) 0.0038(6) -0.0063(7) 0.0076(6) 
C21 0.0396(8) 0.0267(7) 0.0481(9) -0.0074(6) -0.0001(7) -0.0005(6) 
 
_geom_special_details 
; 
 All esds (except the esd in the dihedral angle between two l.s. planes) 
 are estimated using the full covariance matrix.  The cell esds are taken 
 into account individually in the estimation of esds in distances, angles 
 and torsion angles; correlations between esds in cell parameters are only 
 used when they are defined by crystal symmetry.  An approximate (isotropic) 
 treatment of cell esds is used for estimating esds involving l.s. planes. 
; 
 
loop_ 
 _geom_bond_atom_site_label_1 
 _geom_bond_atom_site_label_2 
 _geom_bond_distance 
 _geom_bond_site_symmetry_2 
 _geom_bond_publ_flag 
P1 C16 1.8730(14) . ? 
P1 C19 1.8763(14) . ? 
P1 Si1 2.3070(8) . ? 
Si1 N2 1.8749(11) . ? 
Si1 N1 1.8805(12) . ? 
Si1 C5 2.3425(13) . ? 
N1 C5 1.3445(16) . ? 
N1 C1 1.4851(17) . ? 
N2 C5 1.3347(17) . ? 
N2 C12 1.4748(16) . ? 
C1 C2 1.512(2) . ? 
C1 C4 1.522(2) . ? 
C1 C3 1.520(2) . ? 
C2 H2A 0.91(3) . ? 
C2 H2B 0.99(3) . ? 
C2 H2C 0.99(3) . ? 
C3 H3A 0.91(3) . ? 
C3 H3B 0.90(2) . ? 
C3 H3C 1.18(4) . ? 
C4 H4A 0.98(3) . ? 
C4 H4B 0.91(3) . ? 
C4 H4C 0.95(3) . ? 
C5 C6 1.4912(17) . ? 
C6 C7 1.386(2) . ? 
C6 C11 1.392(2) . ? 
C7 C8 1.394(2) . ? 
C7 H7 0.94(2) . ? 
C8 C9 1.381(3) . ? 
C8 H8 0.97(2) . ? 
C9 C10 1.380(3) . ? 
C9 H9 0.99(2) . ? 
C10 C11 1.388(2) . ? 
C10 H10 0.94(2) . ? 
C11 H11 0.90(2) . ? 
C12 C15 1.523(2) . ? 
C12 C13 1.526(2) . ? 
C12 C14 1.529(2) . ? 
C13 H13A 0.95(2) . ? 
C13 H13B 0.99(3) . ? 
C13 H13C 0.94(3) . ? 
C14 H14A 1.03(2) . ? 
C14 H14B 0.97(2) . ? 
C14 H14C 0.92(2) . ? 
C15 H15A 1.01(3) . ? 
C15 H15B 0.99(2) . ? 
C15 H15C 0.92(3) . ? 
C16 C17 1.528(2) . ? 
C16 C18 1.526(2) . ? 
C16 H16 1.012(18) . ? 
C17 H17A 0.92(3) . ? 
C17 H17B 1.01(2) . ? 
C17 H17C 0.89(2) . ? 
C18 H18A 0.91(2) . ? 
C18 H18B 0.98(2) . ? 
C18 H18C 1.02(3) . ? 
C19 C21 1.521(2) . ? 
C19 C20 1.527(2) . ? 
C19 H19 0.952(18) . ? 
C20 H20A 0.96(2) . ? 
C20 H20B 0.97(2) . ? 
C20 H20C 0.94(2) . ? 
C21 H21A 0.86(3) . ? 
C21 H21B 0.96(2) . ? 
C21 H21C 0.98(2) . ? 
 
loop_ 
 _geom_angle_atom_site_label_1 
 _geom_angle_atom_site_label_2 
 _geom_angle_atom_site_label_3 
 _geom_angle 
 _geom_angle_site_symmetry_1 
 _geom_angle_site_symmetry_3 
 _geom_angle_publ_flag 
C16 P1 C19 102.93(6) . . ? 
C16 P1 Si1 110.36(5) . . ? 
C19 P1 Si1 101.36(4) . . ? 
N2 Si1 N1 69.31(5) . . ? 
N2 Si1 P1 99.82(4) . . ? 
N1 Si1 P1 107.35(4) . . ? 
N2 Si1 C5 34.70(5) . . ? 
N1 Si1 C5 35.01(4) . . ? 
P1 Si1 C5 110.53(3) . . ? 
C5 N1 C1 128.29(11) . . ? 
C5 N1 Si1 91.63(8) . . ? 
C1 N1 Si1 132.29(9) . . ? 
C5 N2 C12 131.54(11) . . ? 
C5 N2 Si1 92.18(8) . . ? 
C12 N2 Si1 136.28(9) . . ? 
N1 C1 C2 106.36(13) . . ? 
N1 C1 C4 111.75(13) . . ? 
C2 C1 C4 110.71(19) . . ? 
N1 C1 C3 110.18(13) . . ? 
C2 C1 C3 107.65(16) . . ? 
C4 C1 C3 110.1(2) . . ? 
C1 C2 H2A 108.5(17) . . ? 
C1 C2 H2B 107.8(17) . . ? 
H2A C2 H2B 111(2) . . ? 
C1 C2 H2C 103.9(18) . . ? 
H2A C2 H2C 110(2) . . ? 
H2B C2 H2C 116(2) . . ? 
C1 C3 H3A 110(2) . . ? 
C1 C3 H3B 109.3(14) . . ? 
H3A C3 H3B 107(2) . . ? 
C1 C3 H3C 106.7(16) . . ? 
H3A C3 H3C 115(3) . . ? 
H3B C3 H3C 109(2) . . ? 
C1 C4 H4A 109.6(18) . . ? 
C1 C4 H4B 107.1(16) . . ? 
H4A C4 H4B 110(2) . . ? 
C1 C4 H4C 118.7(19) . . ? 
H4A C4 H4C 93(2) . . ? 
H4B C4 H4C 118(2) . . ? 
N2 C5 N1 105.69(11) . . ? 
N2 C5 C6 126.84(11) . . ? 
N1 C5 C6 127.43(11) . . ? 
N2 C5 Si1 53.11(6) . . ? 
N1 C5 Si1 53.36(6) . . ? 
C6 C5 Si1 170.65(9) . . ? 
C7 C6 C11 119.57(13) . . ? 
C7 C6 C5 121.18(12) . . ? 
C11 C6 C5 119.26(12) . . ? 
C6 C7 C8 119.97(15) . . ? 
C6 C7 H7 122.4(14) . . ? 
C8 C7 H7 117.7(14) . . ? 
C9 C8 C7 120.10(15) . . ? 
C9 C8 H8 121.8(14) . . ? 
C7 C8 H8 118.0(14) . . ? 
C8 C9 C10 120.12(14) . . ? 
C8 C9 H9 122.3(14) . . ? 
C10 C9 H9 117.6(14) . . ? 
C9 C10 C11 120.11(16) . . ? 
C9 C10 H10 121.4(13) . . ? 
C11 C10 H10 118.5(13) . . ? 
C10 C11 C6 120.13(15) . . ? 
C10 C11 H11 118.5(12) . . ? 
C6 C11 H11 121.4(12) . . ? 
N2 C12 C15 108.96(12) . . ? 
N2 C12 C13 112.53(12) . . ? 
C15 C12 C13 111.69(16) . . ? 
N2 C12 C14 105.74(12) . . ? 
C15 C12 C14 109.47(14) . . ? 
C13 C12 C14 108.24(13) . . ? 
C12 C13 H13A 111.7(13) . . ? 
C12 C13 H13B 107.5(14) . . ? 
H13A C13 H13B 105.8(19) . . ? 
C12 C13 H13C 114.0(16) . . ? 
H13A C13 H13C 110(2) . . ? 
H13B C13 H13C 108(2) . . ? 
C12 C14 H14A 109.9(13) . . ? 
C12 C14 H14B 110.6(12) . . ? 
H14A C14 H14B 110.4(19) . . ? 
C12 C14 H14C 108.8(14) . . ? 
H14A C14 H14C 107.6(18) . . ? 
H14B C14 H14C 109.4(18) . . ? 
C12 C15 H15A 108.4(18) . . ? 
C12 C15 H15B 109.9(13) . . ? 
H15A C15 H15B 115(2) . . ? 
C12 C15 H15C 107.1(15) . . ? 
H15A C15 H15C 119(2) . . ? 
H15B C15 H15C 97.3(19) . . ? 
C17 C16 C18 110.21(13) . . ? 
C17 C16 P1 108.57(10) . . ? 
C18 C16 P1 110.71(10) . . ? 
C17 C16 H16 107.2(11) . . ? 
C18 C16 H16 110.4(10) . . ? 
P1 C16 H16 109.6(9) . . ? 
C16 C17 H17A 110.6(15) . . ? 
C16 C17 H17B 107.6(13) . . ? 
H17A C17 H17B 113.1(19) . . ? 
C16 C17 H17C 113.6(16) . . ? 
H17A C17 H17C 107(2) . . ? 
H17B C17 H17C 104.8(19) . . ? 
C16 C18 H18A 108.7(13) . . ? 
C16 C18 H18B 111.1(13) . . ? 
H18A C18 H18B 109.1(19) . . ? 
C16 C18 H18C 110.4(14) . . ? 
H18A C18 H18C 111(2) . . ? 
H18B C18 H18C 107(2) . . ? 
C21 C19 C20 110.75(14) . . ? 
C21 C19 P1 115.84(10) . . ? 
C20 C19 P1 109.18(10) . . ? 
C21 C19 H19 106.0(10) . . ? 
C20 C19 H19 108.4(10) . . ? 
P1 C19 H19 106.3(10) . . ? 
C19 C20 H20A 112.8(14) . . ? 
C19 C20 H20B 111.6(14) . . ? 
H20A C20 H20B 106.3(19) . . ? 
C19 C20 H20C 112.5(14) . . ? 
H20A C20 H20C 106.4(19) . . ? 
H20B C20 H20C 107(2) . . ? 
C19 C21 H21A 113.0(17) . . ? 
C19 C21 H21B 111.5(12) . . ? 
H21A C21 H21B 104(2) . . ? 
C19 C21 H21C 108.1(11) . . ? 
H21A C21 H21C 106(2) . . ? 
H21B C21 H21C 114.9(17) . . ? 
 
loop_ 
 _geom_torsion_atom_site_label_1 
 _geom_torsion_atom_site_label_2 
 _geom_torsion_atom_site_label_3 
 _geom_torsion_atom_site_label_4 
 _geom_torsion 
 _geom_torsion_site_symmetry_1 
 _geom_torsion_site_symmetry_2 
 _geom_torsion_site_symmetry_3 
 _geom_torsion_site_symmetry_4 
 _geom_torsion_publ_flag 
C16 P1 Si1 N2 -84.96(6) . . . . ? 
C19 P1 Si1 N2 166.50(5) . . . . ? 
C16 P1 Si1 N1 -13.72(6) . . . . ? 
C19 P1 Si1 N1 -122.26(6) . . . . ? 
C16 P1 Si1 C5 -50.66(6) . . . . ? 
C19 P1 Si1 C5 -159.20(6) . . . . ? 
N2 Si1 N1 C5 -7.03(7) . . . . ? 
P1 Si1 N1 C5 -101.21(7) . . . . ? 
N2 Si1 N1 C1 -156.79(13) . . . . ? 
P1 Si1 N1 C1 109.03(12) . . . . ? 
C5 Si1 N1 C1 -149.76(16) . . . . ? 
N1 Si1 N2 C5 7.08(7) . . . . ? 
P1 Si1 N2 C5 112.04(7) . . . . ? 
N1 Si1 N2 C12 -173.41(14) . . . . ? 
P1 Si1 N2 C12 -68.46(13) . . . . ? 
C5 Si1 N2 C12 179.50(18) . . . . ? 
C5 N1 C1 C2 177.87(16) . . . . ? 
Si1 N1 C1 C2 -42.03(19) . . . . ? 
C5 N1 C1 C4 56.9(2) . . . . ? 
Si1 N1 C1 C4 -162.96(18) . . . . ? 
C5 N1 C1 C3 -65.7(2) . . . . ? 
Si1 N1 C1 C3 74.37(18) . . . . ? 
C12 N2 C5 N1 170.81(13) . . . . ? 
Si1 N2 C5 N1 -9.65(10) . . . . ? 
C12 N2 C5 C6 -11.2(2) . . . . ? 
Si1 N2 C5 C6 168.30(12) . . . . ? 
C12 N2 C5 Si1 -179.54(16) . . . . ? 
C1 N1 C5 N2 161.28(12) . . . . ? 
Si1 N1 C5 N2 9.61(10) . . . . ? 
C1 N1 C5 C6 -16.7(2) . . . . ? 
Si1 N1 C5 C6 -168.32(12) . . . . ? 
C1 N1 C5 Si1 151.67(15) . . . . ? 
N1 Si1 C5 N2 -168.40(12) . . . . ? 
P1 Si1 C5 N2 -77.24(8) . . . . ? 
N2 Si1 C5 N1 168.40(12) . . . . ? 
P1 Si1 C5 N1 91.17(8) . . . . ? 
N2 Si1 C5 C6 -93.2(6) . . . . ? 
N1 Si1 C5 C6 98.4(6) . . . . ? 
P1 Si1 C5 C6 -170.5(5) . . . . ? 
N2 C5 C6 C7 -84.80(18) . . . . ? 
N1 C5 C6 C7 92.71(17) . . . . ? 
Si1 C5 C6 C7 1.4(6) . . . . ? 
N2 C5 C6 C11 95.25(16) . . . . ? 
N1 C5 C6 C11 -87.23(17) . . . . ? 
Si1 C5 C6 C11 -178.6(5) . . . . ? 
C11 C6 C7 C8 -0.1(2) . . . . ? 
C5 C6 C7 C8 179.92(13) . . . . ? 
C6 C7 C8 C9 0.0(2) . . . . ? 
C7 C8 C9 C10 -0.2(3) . . . . ? 
C8 C9 C10 C11 0.5(3) . . . . ? 
C9 C10 C11 C6 -0.7(2) . . . . ? 
C7 C6 C11 C10 0.5(2) . . . . ? 
C5 C6 C11 C10 -179.59(13) . . . . ? 
C5 N2 C12 C15 -78.15(19) . . . . ? 
Si1 N2 C12 C15 102.51(16) . . . . ? 
C5 N2 C12 C13 46.3(2) . . . . ? 
Si1 N2 C12 C13 -133.04(14) . . . . ? 
C5 N2 C12 C14 164.27(14) . . . . ? 
Si1 N2 C12 C14 -15.07(18) . . . . ? 
C19 P1 C16 C17 -179.52(11) . . . . ? 
Si1 P1 C16 C17 72.98(11) . . . . ? 
C19 P1 C16 C18 -58.41(12) . . . . ? 
Si1 P1 C16 C18 -165.91(10) . . . . ? 
C16 P1 C19 C21 -57.94(13) . . . . ? 
Si1 P1 C19 C21 56.27(12) . . . . ? 
C16 P1 C19 C20 176.23(11) . . . . ? 
Si1 P1 C19 C20 -69.55(11) . . . . ? 
 
_diffrn_measured_fraction_theta_max    0.997 
_diffrn_reflns_theta_full              29.16 
_diffrn_measured_fraction_theta_full   0.997 
_refine_diff_density_max    0.202 
_refine_diff_density_min   -0.151 
_refine_diff_density_rms    0.032 


#===END

data_compound4

_audit_creation_date              07-06-04
_audit_creation_method            'STOE X-RED'
_chemical_name_systematic 
; 
 ? 
; 
_chemical_name_common             ? 
_chemical_melting_point           ? 
_chemical_formula_moiety          'C26 H46 Cl2 N4 Si5' 
_chemical_formula_sum 
 'C26 H46 Cl2 N4 Si5' 
_chemical_formula_weight          626.02 
 
loop_ 
 _atom_type_symbol 
 _atom_type_description 
 _atom_type_scat_dispersion_real 
 _atom_type_scat_dispersion_imag 
 _atom_type_scat_source 
 'C'  'C'   0.0033   0.0016 
 'International Tables Vol C Tables 4.2.6.8 and 6.1.1.4' 
 'H'  'H'   0.0000   0.0000 
 'International Tables Vol C Tables 4.2.6.8 and 6.1.1.4' 
 'N'  'N'   0.0061   0.0033 
 'International Tables Vol C Tables 4.2.6.8 and 6.1.1.4' 
 'Si'  'Si'   0.0817   0.0704 
 'International Tables Vol C Tables 4.2.6.8 and 6.1.1.4' 
 'Cl'  'Cl'   0.1484   0.1585 
 'International Tables Vol C Tables 4.2.6.8 and 6.1.1.4' 
 
_symmetry_cell_setting            monoclinic
_symmetry_space_group_name_H-M    'C 2/c'
_symmetry_space_group_name_Hall   '-C 2yc'
_symmetry_Int_Tables_number       15
 
loop_ 
 _symmetry_equiv_pos_as_xyz 
 'x, y, z' 
 '-x, y, -z+1/2' 
 'x+1/2, y+1/2, z' 
 '-x+1/2, y+1/2, -z+1/2' 
 '-x, -y, -z' 
 'x, -y, z-1/2' 
 '-x+1/2, -y+1/2, -z' 
 'x+1/2, -y+1/2, z-1/2' 
 
_cell_length_a                    21.2473(15) 
_cell_length_b                    8.9149(5) 
_cell_length_c                    18.8561(14) 
_cell_angle_alpha                 90.00 
_cell_angle_beta                  90.016(6) 
_cell_angle_gamma                 90.00 
_cell_volume                      3571.7(4) 
_cell_formula_units_Z             4 
_cell_measurement_temperature     200(2) 
_cell_measurement_reflns_used     12176
_cell_measurement_theta_min       2.70
_cell_measurement_theta_max       29.55
 
_exptl_crystal_description        'prism'
_exptl_crystal_colour             'brown'
_exptl_crystal_size_max           0.264
_exptl_crystal_size_mid           0.239
_exptl_crystal_size_min           0.220
_exptl_crystal_density_meas       ? 
_exptl_crystal_density_diffrn     1.164 
_exptl_crystal_density_method     'not measured' 
_exptl_crystal_F_000              1336 
_exptl_absorpt_coefficient_mu     0.371 
_exptl_absorpt_correction_type    integration
_exptl_absorpt_correction_T_min   0.9166
_exptl_absorpt_correction_T_max   0.9546
_exptl_absorpt_process_details    'STOE X-RED & X-SHAPE'  
 
_exptl_special_details 
; 
 ? 
; 
 
_diffrn_ambient_temperature       200(2) 
_diffrn_radiation_wavelength      0.71073 
_diffrn_radiation_type            MoK\a 
_diffrn_radiation_source          'fine-focus sealed tube' 
_diffrn_radiation_monochromator   graphite 
_diffrn_measurement_device_type   'STOE IPDS 2T' 
_diffrn_measurement_method        'area detector'
_diffrn_detector_area_resol_mean  ? 
_diffrn_standards_number          ? 
_diffrn_standards_interval_count  ? 
_diffrn_standards_interval_time   ? 
_diffrn_standards_decay_%         ? 
_diffrn_reflns_number             11434 
_diffrn_reflns_av_R_equivalents   0.0335 
_diffrn_reflns_av_sigmaI/netI     0.0264 
_diffrn_reflns_limit_h_min        -24 
_diffrn_reflns_limit_h_max        25 
_diffrn_reflns_limit_k_min        -10 
_diffrn_reflns_limit_k_max        10 
_diffrn_reflns_limit_l_min        -22 
_diffrn_reflns_limit_l_max        22 
_diffrn_reflns_theta_min          2.70 
_diffrn_reflns_theta_max          25.02 
_reflns_number_total              3156 
_reflns_number_gt                 2598 
_reflns_threshold_expression      >2sigma(I) 
 
_computing_data_collection        'STOE X-AREA'
_computing_cell_refinement        'STOE X-AREA, PLATON (A.L.Spek, 2005)'
_computing_data_reduction         'STOE X-RED, PLATON (A.L.Spek, 2005)'
_computing_structure_solution     'SHELXS-97 (Sheldrick, 1997)' 
_computing_structure_refinement   'SHELXL-97 (Sheldrick, 1997)' 
_computing_molecular_graphics     'Diamond 2.1e' 
_computing_publication_material   'X-STEP32, Microsoft Word' 
 
_refine_special_details 
; 
 Refinement of F^2^ against ALL reflections.  The weighted R-factor wR and 
 goodness of fit S are based on F^2^, conventional R-factors R are based 
 on F, with F set to zero for negative F^2^. The threshold expression of 
 F^2^ > 2sigma(F^2^) is used only for calculating R-factors(gt) etc. and is 
 not relevant to the choice of reflections for refinement.  R-factors based 
 on F^2^ are statistically about twice as large as those based on F, and R- 
 factors based on ALL data will be even larger. 
; 
 
_refine_ls_structure_factor_coef  Fsqd  
_refine_ls_matrix_type            full 
_refine_ls_weighting_scheme       calc  
_refine_ls_weighting_details 
 'calc w=1/[\s^2^(Fo^2^)+(0.0540P)^2^+0.6303P] where P=(Fo^2^+2Fc^2^)/3' 
_atom_sites_solution_primary      direct 
_atom_sites_solution_secondary    difmap 
_atom_sites_solution_hydrogens    geom 
_refine_ls_hydrogen_treatment     constr 
_refine_ls_extinction_method      none 
_refine_ls_extinction_coef        ? 
_refine_ls_number_reflns          3156 
_refine_ls_number_parameters      174 
_refine_ls_number_restraints      0 
_refine_ls_R_factor_all           0.0433 
_refine_ls_R_factor_gt            0.0321 
_refine_ls_wR_factor_ref          0.0857 
_refine_ls_wR_factor_gt           0.0812 
_refine_ls_goodness_of_fit_ref    1.027 
_refine_ls_restrained_S_all       1.027 
_refine_ls_shift/su_max           0.001 
_refine_ls_shift/su_mean          0.000 
 
loop_ 
 _atom_site_label 
 _atom_site_type_symbol 
 _atom_site_fract_x 
 _atom_site_fract_y 
 _atom_site_fract_z 
 _atom_site_U_iso_or_equiv 
 _atom_site_adp_type 
 _atom_site_occupancy 
 _atom_site_symmetry_multiplicity 
 _atom_site_calc_flag 
 _atom_site_refinement_flags 
 _atom_site_disorder_assembly 
 _atom_site_disorder_group 
C1 C -0.06256(7) 0.82061(19) 0.16701(9) 0.0296(4) Uani 1 1 d . . . 
C2 C -0.10062(8) 0.7605(2) 0.10726(9) 0.0333(4) Uani 1 1 d . . . 
C3 C -0.14416(9) 0.6454(2) 0.11630(10) 0.0439(5) Uani 1 1 d . . . 
H3 H -0.1503 0.6022 0.1618 0.053 Uiso 1 1 calc R . . 
C4 C -0.17849(10) 0.5941(3) 0.05880(12) 0.0555(6) Uani 1 1 d . . . 
H4 H -0.2080 0.5151 0.0648 0.067 Uiso 1 1 calc R . . 
C5 C -0.16991(11) 0.6574(3) -0.00702(11) 0.0594(6) Uani 1 1 d . . . 
H5 H -0.1939 0.6228 -0.0463 0.071 Uiso 1 1 calc R . . 
C6 C -0.12684(11) 0.7702(3) -0.01622(11) 0.0596(6) Uani 1 1 d . . . 
H6 H -0.1209 0.8128 -0.0619 0.072 Uiso 1 1 calc R . . 
C7 C -0.09208(9) 0.8225(3) 0.04051(10) 0.0461(5) Uani 1 1 d . . . 
H7 H -0.0624 0.9008 0.0338 0.055 Uiso 1 1 calc R . . 
C8 C 0.08075(10) 0.7643(3) 0.05025(11) 0.0517(5) Uani 1 1 d . . . 
H8A H 0.0474 0.7854 0.0157 0.078 Uiso 1 1 calc R . . 
H8B H 0.1129 0.7006 0.0282 0.078 Uiso 1 1 calc R . . 
H8C H 0.1000 0.8587 0.0657 0.078 Uiso 1 1 calc R . . 
C9 C 0.10966(10) 0.6023(3) 0.19031(11) 0.0524(5) Uani 1 1 d . . . 
H9A H 0.1368 0.6876 0.2021 0.079 Uiso 1 1 calc R . . 
H9B H 0.1348 0.5238 0.1675 0.079 Uiso 1 1 calc R . . 
H9C H 0.0907 0.5626 0.2338 0.079 Uiso 1 1 calc R . . 
C10 C 0.00223(10) 0.4954(2) 0.10087(11) 0.0456(5) Uani 1 1 d . . . 
H10A H -0.0190 0.4517 0.1421 0.068 Uiso 1 1 calc R . . 
H10B H 0.0315 0.4218 0.0808 0.068 Uiso 1 1 calc R . . 
H10C H -0.0291 0.5230 0.0650 0.068 Uiso 1 1 calc R . . 
C11 C -0.13321(12) 1.2288(3) 0.1970(2) 0.0870(10) Uani 1 1 d . . . 
H11A H -0.1034 1.2681 0.2320 0.131 Uiso 1 1 calc R . . 
H11B H -0.1720 1.2882 0.1983 0.131 Uiso 1 1 calc R . . 
H11C H -0.1145 1.2349 0.1496 0.131 Uiso 1 1 calc R . . 
C12 C -0.18715(11) 1.0123(4) 0.30752(14) 0.0704(7) Uani 1 1 d . . . 
H12A H -0.2037 0.9104 0.3135 0.106 Uiso 1 1 calc R . . 
H12B H -0.2215 1.0848 0.3126 0.106 Uiso 1 1 calc R . . 
H12C H -0.1550 1.0317 0.3437 0.106 Uiso 1 1 calc R . . 
C13 C -0.21229(10) 0.9682(4) 0.15393(15) 0.0752(9) Uani 1 1 d . . . 
H13A H -0.1954 0.9739 0.1057 0.113 Uiso 1 1 calc R . . 
H13B H -0.2494 1.0331 0.1578 0.113 Uiso 1 1 calc R . . 
H13C H -0.2243 0.8644 0.1645 0.113 Uiso 1 1 calc R . . 
N1 N -0.00199(6) 0.78990(16) 0.17682(7) 0.0298(3) Uani 1 1 d . . . 
N2 N -0.08211(6) 0.92124(16) 0.21445(8) 0.0310(3) Uani 1 1 d . . . 
Si1 Si 0.0000 0.94073(7) 0.2500 0.02962(16) Uani 1 2 d S . . 
Si2 Si 0.04641(2) 0.66518(6) 0.12865(3) 0.03439(14) Uani 1 1 d . . . 
Si3 Si -0.15156(2) 1.03076(6) 0.21790(3) 0.04300(16) Uani 1 1 d . . . 
Cl Cl 0.02570(2) 1.10980(6) 0.17065(3) 0.04980(16) Uani 1 1 d . . . 
 
loop_ 
 _atom_site_aniso_label 
 _atom_site_aniso_U_11 
 _atom_site_aniso_U_22 
 _atom_site_aniso_U_33 
 _atom_site_aniso_U_23 
 _atom_site_aniso_U_13 
 _atom_site_aniso_U_12 
C1 0.0274(8) 0.0277(9) 0.0337(9) 0.0046(7) 0.0030(7) -0.0016(7) 
C2 0.0279(8) 0.0376(10) 0.0343(9) -0.0007(8) 0.0020(7) 0.0065(7) 
C3 0.0433(10) 0.0512(12) 0.0372(10) -0.0030(9) -0.0015(8) -0.0075(9) 
C4 0.0456(11) 0.0690(15) 0.0520(12) -0.0143(11) -0.0058(9) -0.0094(11) 
C5 0.0477(12) 0.0900(18) 0.0405(11) -0.0165(12) -0.0117(9) 0.0112(12) 
C6 0.0542(13) 0.0892(19) 0.0355(11) 0.0099(11) -0.0031(9) 0.0163(13) 
C7 0.0406(10) 0.0552(12) 0.0424(11) 0.0119(9) 0.0008(8) 0.0077(9) 
C8 0.0516(12) 0.0574(13) 0.0461(11) 0.0026(10) 0.0209(9) 0.0025(10) 
C9 0.0485(12) 0.0593(14) 0.0493(11) -0.0078(10) -0.0019(9) 0.0285(10) 
C10 0.0504(11) 0.0353(10) 0.0509(11) -0.0067(9) 0.0080(9) 0.0073(9) 
C11 0.0492(14) 0.0435(14) 0.168(3) 0.0092(17) -0.0081(16) 0.0169(11) 
C12 0.0406(12) 0.094(2) 0.0762(17) -0.0256(15) 0.0129(11) 0.0162(12) 
C13 0.0357(11) 0.096(2) 0.0938(19) -0.0348(16) -0.0188(12) 0.0230(12) 
N1 0.0258(7) 0.0308(8) 0.0327(7) 0.0022(6) 0.0038(5) 0.0028(6) 
N2 0.0226(6) 0.0284(7) 0.0421(8) -0.0023(6) 0.0014(6) 0.0002(5) 
Si1 0.0215(3) 0.0248(3) 0.0426(4) 0.000 0.0026(3) 0.000 
Si2 0.0332(3) 0.0368(3) 0.0332(3) 0.0008(2) 0.00632(19) 0.0085(2) 
Si3 0.0237(2) 0.0417(3) 0.0637(4) -0.0112(3) -0.0015(2) 0.0069(2) 
Cl 0.0342(2) 0.0395(3) 0.0757(4) 0.0248(2) -0.0017(2) -0.00323(19) 
 
_geom_special_details 
; 
 All esds (except the esd in the dihedral angle between two l.s. planes) 
 are estimated using the full covariance matrix.  The cell esds are taken 
 into account individually in the estimation of esds in distances, angles 
 and torsion angles; correlations between esds in cell parameters are only 
 used when they are defined by crystal symmetry.  An approximate (isotropic) 
 treatment of cell esds is used for estimating esds involving l.s. planes. 
; 
 
loop_ 
 _geom_bond_atom_site_label_1 
 _geom_bond_atom_site_label_2 
 _geom_bond_distance 
 _geom_bond_site_symmetry_2 
 _geom_bond_publ_flag 
C1 N1 1.329(2) . ? 
C1 N2 1.333(2) . ? 
C1 C2 1.487(2) . ? 
C1 Si1 2.3154(17) . ? 
C2 C7 1.387(3) . ? 
C2 C3 1.392(3) . ? 
C3 C4 1.384(3) . ? 
C4 C5 1.376(3) . ? 
C5 C6 1.371(4) . ? 
C6 C7 1.381(3) . ? 
C8 Si2 1.871(2) . ? 
C9 Si2 1.863(2) . ? 
C10 Si2 1.856(2) . ? 
C11 Si3 1.850(3) . ? 
C12 Si3 1.859(3) . ? 
C13 Si3 1.852(2) . ? 
N1 Si2 1.7660(14) . ? 
N1 Si1 1.9272(15) . ? 
N2 Si3 1.7706(14) . ? 
N2 Si1 1.8768(13) . ? 
Si1 N2 1.8767(13) 2 ? 
Si1 N1 1.9272(15) 2 ? 
Si1 Cl 2.1929(7) 2 ? 
Si1 Cl 2.1929(7) . ? 
Si1 C1 2.3153(17) 2 ? 
 
loop_ 
 _geom_angle_atom_site_label_1 
 _geom_angle_atom_site_label_2 
 _geom_angle_atom_site_label_3 
 _geom_angle 
 _geom_angle_site_symmetry_1 
 _geom_angle_site_symmetry_3 
 _geom_angle_publ_flag 
N1 C1 N2 110.32(15) . . ? 
N1 C1 C2 123.91(15) . . ? 
N2 C1 C2 125.56(14) . . ? 
N1 C1 Si1 56.32(9) . . ? 
N2 C1 Si1 54.15(8) . . ? 
C2 C1 Si1 172.31(12) . . ? 
C7 C2 C3 119.48(17) . . ? 
C7 C2 C1 118.21(17) . . ? 
C3 C2 C1 122.31(16) . . ? 
C4 C3 C2 119.86(19) . . ? 
C5 C4 C3 120.1(2) . . ? 
C6 C5 C4 120.3(2) . . ? 
C5 C6 C7 120.4(2) . . ? 
C6 C7 C2 119.9(2) . . ? 
C1 N1 Si2 128.48(12) . . ? 
C1 N1 Si1 88.68(10) . . ? 
Si2 N1 Si1 142.64(8) . . ? 
C1 N2 Si3 130.95(12) . . ? 
C1 N2 Si1 90.70(10) . . ? 
Si3 N2 Si1 135.27(9) . . ? 
N2 Si1 N2 169.37(9) 2 . ? 
N2 Si1 N1 70.09(6) 2 2 ? 
N2 Si1 N1 102.20(6) . 2 ? 
N2 Si1 N1 102.20(6) 2 . ? 
N2 Si1 N1 70.09(6) . . ? 
N1 Si1 N1 91.51(9) 2 . ? 
N2 Si1 Cl 92.96(5) 2 2 ? 
N2 Si1 Cl 94.34(5) . 2 ? 
N1 Si1 Cl 89.80(4) 2 2 ? 
N1 Si1 Cl 164.30(4) . 2 ? 
N2 Si1 Cl 94.34(5) 2 . ? 
N2 Si1 Cl 92.96(5) . . ? 
N1 Si1 Cl 164.30(4) 2 . ? 
N1 Si1 Cl 89.80(4) . . ? 
Cl Si1 Cl 93.16(4) 2 . ? 
N2 Si1 C1 35.16(6) 2 2 ? 
N2 Si1 C1 137.05(6) . 2 ? 
N1 Si1 C1 35.00(6) 2 2 ? 
N1 Si1 C1 100.00(6) . 2 ? 
Cl Si1 C1 89.99(4) 2 2 ? 
Cl Si1 C1 129.50(4) . 2 ? 
N2 Si1 C1 137.04(6) 2 . ? 
N2 Si1 C1 35.16(6) . . ? 
N1 Si1 C1 100.00(6) 2 . ? 
N1 Si1 C1 35.01(6) . . ? 
Cl Si1 C1 129.49(4) 2 . ? 
Cl Si1 C1 89.99(4) . . ? 
C1 Si1 C1 124.90(9) 2 . ? 
N1 Si2 C10 111.35(8) . . ? 
N1 Si2 C9 106.76(8) . . ? 
C10 Si2 C9 107.19(11) . . ? 
N1 Si2 C8 109.66(9) . . ? 
C10 Si2 C8 111.06(10) . . ? 
C9 Si2 C8 110.71(11) . . ? 
N2 Si3 C11 110.04(9) . . ? 
N2 Si3 C13 112.98(9) . . ? 
C11 Si3 C13 107.18(15) . . ? 
N2 Si3 C12 108.88(10) . . ? 
C11 Si3 C12 111.36(16) . . ? 
C13 Si3 C12 106.37(12) . . ? 
 
loop_ 
 _geom_torsion_atom_site_label_1 
 _geom_torsion_atom_site_label_2 
 _geom_torsion_atom_site_label_3 
 _geom_torsion_atom_site_label_4 
 _geom_torsion 
 _geom_torsion_site_symmetry_1 
 _geom_torsion_site_symmetry_2 
 _geom_torsion_site_symmetry_3 
 _geom_torsion_site_symmetry_4 
 _geom_torsion_publ_flag 
N1 C1 C2 C7 -75.6(2) . . . . ? 
N2 C1 C2 C7 98.6(2) . . . . ? 
Si1 C1 C2 C7 13.5(10) . . . . ? 
N1 C1 C2 C3 104.6(2) . . . . ? 
N2 C1 C2 C3 -81.3(2) . . . . ? 
Si1 C1 C2 C3 -166.3(8) . . . . ? 
C7 C2 C3 C4 0.0(3) . . . . ? 
C1 C2 C3 C4 179.78(18) . . . . ? 
C2 C3 C4 C5 -0.5(3) . . . . ? 
C3 C4 C5 C6 0.8(4) . . . . ? 
C4 C5 C6 C7 -0.6(4) . . . . ? 
C5 C6 C7 C2 0.1(3) . . . . ? 
C3 C2 C7 C6 0.2(3) . . . . ? 
C1 C2 C7 C6 -179.60(18) . . . . ? 
N2 C1 N1 Si2 -179.94(12) . . . . ? 
C2 C1 N1 Si2 -5.0(2) . . . . ? 
Si1 C1 N1 Si2 -175.78(15) . . . . ? 
N2 C1 N1 Si1 -4.17(13) . . . . ? 
C2 C1 N1 Si1 170.75(15) . . . . ? 
N1 C1 N2 Si3 166.33(12) . . . . ? 
C2 C1 N2 Si3 -8.5(3) . . . . ? 
Si1 C1 N2 Si3 162.05(17) . . . . ? 
N1 C1 N2 Si1 4.28(14) . . . . ? 
C2 C1 N2 Si1 -170.53(15) . . . . ? 
C1 N2 Si1 N2 -47.56(9) . . . 2 ? 
Si3 N2 Si1 N2 151.76(12) . . . 2 ? 
C1 N2 Si1 N1 -90.09(10) . . . 2 ? 
Si3 N2 Si1 N1 109.22(12) . . . 2 ? 
C1 N2 Si1 N1 -2.94(9) . . . . ? 
Si3 N2 Si1 N1 -163.62(14) . . . . ? 
C1 N2 Si1 Cl 179.17(9) . . . 2 ? 
Si3 N2 Si1 Cl 18.49(12) . . . 2 ? 
C1 N2 Si1 Cl 85.77(10) . . . . ? 
Si3 N2 Si1 Cl -74.91(11) . . . . ? 
C1 N2 Si1 C1 -86.17(15) . . . 2 ? 
Si3 N2 Si1 C1 113.15(12) . . . 2 ? 
Si3 N2 Si1 C1 -160.68(18) . . . . ? 
C1 N1 Si1 N2 175.34(10) . . . 2 ? 
Si2 N1 Si1 N2 -10.12(15) . . . 2 ? 
C1 N1 Si1 N2 2.95(9) . . . . ? 
Si2 N1 Si1 N2 177.50(15) . . . . ? 
C1 N1 Si1 N1 105.38(10) . . . 2 ? 
Si2 N1 Si1 N1 -80.07(13) . . . 2 ? 
C1 N1 Si1 Cl 10.8(2) . . . 2 ? 
Si2 N1 Si1 Cl -174.69(10) . . . 2 ? 
C1 N1 Si1 Cl -90.27(9) . . . . ? 
Si2 N1 Si1 Cl 84.28(13) . . . . ? 
C1 N1 Si1 C1 139.55(9) . . . 2 ? 
Si2 N1 Si1 C1 -45.90(14) . . . 2 ? 
Si2 N1 Si1 C1 174.5(2) . . . . ? 
N1 C1 Si1 N2 -6.70(14) . . . 2 ? 
N2 C1 Si1 N2 168.48(10) . . . 2 ? 
C2 C1 Si1 N2 -100.9(9) . . . 2 ? 
N1 C1 Si1 N2 -175.18(15) . . . . ? 
C2 C1 Si1 N2 90.6(9) . . . . ? 
N1 C1 Si1 N1 -78.16(12) . . . 2 ? 
N2 C1 Si1 N1 97.02(10) . . . 2 ? 
C2 C1 Si1 N1 -172.4(9) . . . 2 ? 
N2 C1 Si1 N1 175.18(15) . . . . ? 
C2 C1 Si1 N1 -94.2(9) . . . . ? 
N1 C1 Si1 Cl -176.25(8) . . . 2 ? 
N2 C1 Si1 Cl -1.07(12) . . . 2 ? 
C2 C1 Si1 Cl 89.5(9) . . . 2 ? 
N1 C1 Si1 Cl 89.66(9) . . . . ? 
N2 C1 Si1 Cl -95.16(10) . . . . ? 
C2 C1 Si1 Cl -4.6(9) . . . . ? 
N1 C1 Si1 C1 -51.17(9) . . . 2 ? 
N2 C1 Si1 C1 124.00(10) . . . 2 ? 
C2 C1 Si1 C1 -145.4(9) . . . 2 ? 
C1 N1 Si2 C10 -36.33(17) . . . . ? 
Si1 N1 Si2 C10 150.64(14) . . . . ? 
C1 N1 Si2 C9 -153.02(16) . . . . ? 
Si1 N1 Si2 C9 33.95(17) . . . . ? 
C1 N1 Si2 C8 87.00(16) . . . . ? 
Si1 N1 Si2 C8 -86.03(16) . . . . ? 
C1 N2 Si3 C11 -107.1(2) . . . . ? 
Si1 N2 Si3 C11 46.93(18) . . . . ? 
C1 N2 Si3 C13 12.7(2) . . . . ? 
Si1 N2 Si3 C13 166.68(15) . . . . ? 
C1 N2 Si3 C12 130.60(17) . . . . ? 
Si1 N2 Si3 C12 -75.38(15) . . . . ? 
 
_diffrn_measured_fraction_theta_max    0.999 
_diffrn_reflns_theta_full              25.02 
_diffrn_measured_fraction_theta_full   0.999 
_refine_diff_density_max    0.362 
_refine_diff_density_min   -0.174 
_refine_diff_density_rms    0.042 

#==============================================================================
